# Supplementary material
Source: HighWire-hosted journal article supplement (https://bmjopen.bmj.com/content/14/12/e084103)
Supplement: inline-supplementary-material-1 [file inline-supplementary-material-1.pdf]

**Barriers and Facilitators in Nurse Prescribing Practices: A Protocol for Qualitative Meta-Synthesis from Nurses' Perspectives**

**Appendix 1**

| Database          | Total studies |
|-------------------|---------------|
| 1.PubMed          | 395           |
| 2.Embase          | 12            |
| 3.Cochane library | 153           |
| 4. Web of science | 2733          |
| 5.CINAHL          | 6             |
