# Supplementary material
Source: HighWire-hosted journal article supplement (https://bmjopen.bmj.com/content/14/12/e084103)
Supplement: inline-supplementary-material-4 [file inline-supplementary-material-4.pdf]

**Barriers and Facilitators in Nurse Prescribing Practices: A Protocol for Qualitative Meta-Synthesis from Nurses' Perspectives**

**Appendix 4: Full Article Screening Form**

| Author<br>Date | Title | Is this a<br>qualitive<br>study? | Does the study present<br>evidence of the<br>prescription of the<br>registered nurse? | Does the study<br>express the nurses'<br>understanding of<br>prescription? | Initials of the<br>screener |
|----------------|-------|----------------------------------|---------------------------------------------------------------------------------------|----------------------------------------------------------------------------|-----------------------------|
|                |       |                                  |                                                                                       |                                                                            |                             |
|                |       |                                  |                                                                                       |                                                                            |                             |
|                |       |                                  |                                                                                       |                                                                            |                             |
|                |       |                                  |                                                                                       |                                                                            |                             |
